# Supplementary material for: Solvent-dependent self-assembly and ordering in slow-drying drop-cast conjugated polymer films
Source: Royal Society of Chemistry journal article supplement (doi:10.1039/c5tc02415c), 2015-01-01
Supplement: c5tc02415c1.pdf [file c5tc02415c1.pdf]

**Note and references:**

Electronic Supplementary Information (ESI) available. See DOI:

## **Solvent-dependent self-assembly and ordering in slow-drying drop-cast conjugated polymer films**

*Kui Zhao,<sup>ab\*</sup> Xinhong Yu,<sup>b</sup> Ruipeng Li,<sup>c</sup> Aram Amassian<sup>c</sup> and Yanchun Han<sup>b\*</sup>*

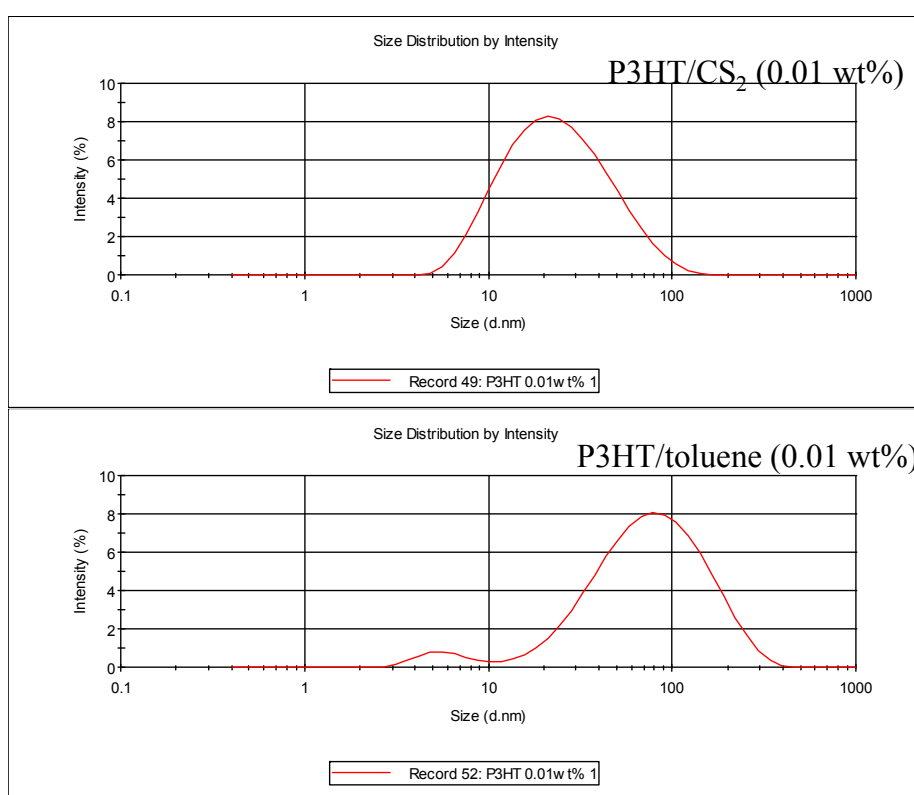

**Figure S1.** Dynamical light scattering data showing the approximate aggregate size distribution of P3HT solutions in good solvent CS<sub>2</sub> and theta solvent toluene.

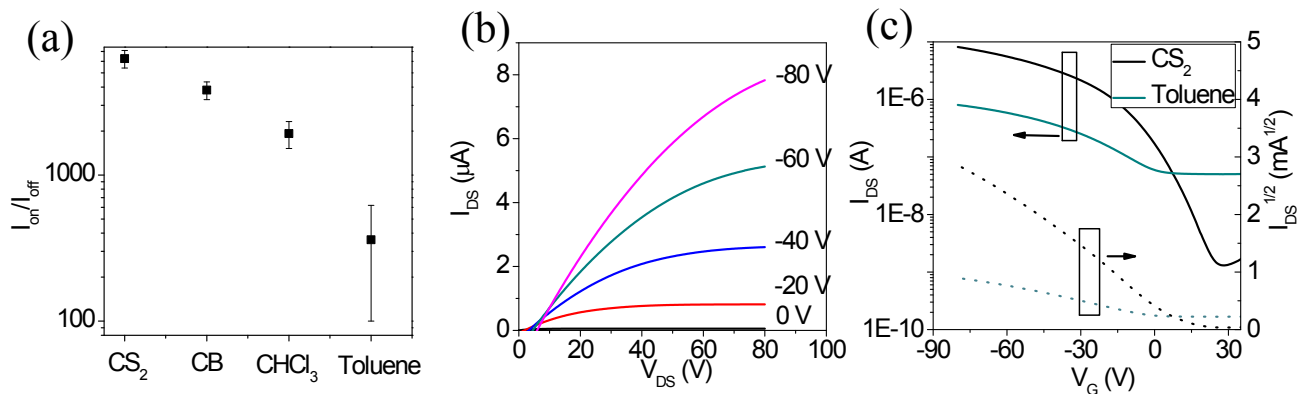

**Figure S2.** Electrical characteristics in ambient conditions of a representative OTFT with P3HT thin films cast from different solvents. (a) evolution of  $I_{on}/I_{off}$  ratio, (b) Output characteristics ( $I_{DS}$  vs.  $V_{DS}$ ) with various  $V_G$  measured for  $CS_2$ -cast film, (c) Transfer characteristics ( $I_{DS}$  vs.  $V_G$ ) with a constant  $V_{DS}$  for P3HT films cast from good solvent  $CS_2$  and theta solvent toluene.

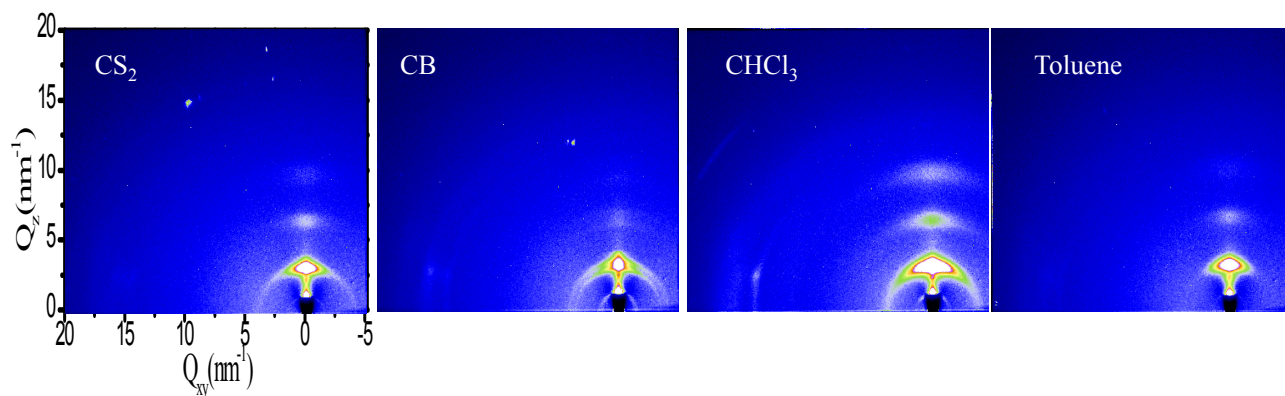

**Figure S3.** Grazing incidence wide angle X-ray scattering (GIWAXS) of the P3HT films cast from different solvents
